1  
2  
3  
4  
5  
6  
7  
8  
9  
10  
11  
12  
13  
14  
15  
16  
17  
18  
19  
20  
21  
22  
23  
24

**Title:** Identification and characterisation of *Botrylloides* species from Aotearoa New Zealand coasts

**Berivan Temiz<sup>1</sup>, Rebecca M. Clarke<sup>1</sup>, Mike Page<sup>3</sup>, Miles Lamare<sup>2</sup>, Megan J. Wilson<sup>1</sup>**

Developmental Biology and Genomics Laboratory, Department of Anatomy, Otago School of Medical Sciences, University of Otago, P.O. Box 56, Dunedin 9054, New Zealand<sup>1</sup>

Department of Marine Science, University of Otago, PO Box 56, Dunedin, New Zealand<sup>2</sup>

National Institute of Water and Atmospheric Research Limited P.O. Box 893 Nelson, New Zealand<sup>3</sup>

25  
26  
27  
28  
29  
30  
31  
32  
33  
34  
35  
36  
37  
38  
39  
40  
41  
42  
43  
44  
45  
46  
47  
48  
49

## ABSTRACT

Botryllid ascidians possess diverse biological abilities like whole-body regeneration (WBR), hibernation/aestivation, blastogenesis, metamorphosis, and natural chimerism. However, the absence of distinctive morphological features often makes identification problematic. *Botrylloides diegensis* is a botryllid ascidian that has been misidentified in previous studies and is recorded in GenBank as *Botrylloides leachii* due to the high morphological similarity between the sister species. More available sequences and strategies around identification would help resolve some of the confusion currently surrounding its ambiguous nature. We collected several *Botrylloides* samples from 7 locations around New Zealand and barcoded the species based on Cytochrome Oxidase I, Histone 3, 18S, and 28S ribosomal RNA markers. Network and Bayesian trees confirmed three *Botrylloides* species: *B. diegensis*, *B. jacksonianum*, and *B. aff. anceps*. Additionally, recognition assays were applied to analyse the histocompatibility between distinct morphs qualitatively.

**Keywords:** ascidian, tunicate, New Zealand, Pacific, barcoding, COI

## 50 INTRODUCTION

51 Ascidiacea includes approximately 3000 identified species that are filter-feeding  
52 marine invertebrates, many with global distribution [1]. Botryllid ascidians, including  
53 the genera of *Botryllus* and *Botrylloides*, are sessile colonial styelid tunicates found  
54 within the intertidal and shallow subtidal zones [2]. The colony is comprised of  
55 numerous genetically identical zooids located inside the tunic, an extracellular  
56 gelatinous matrix. The tunic contains a cellulose-like substance called tunicine and  
57 covers the colonial systems, and protects from the outer environment as a barrier [3].

58

59 Compound tunicates belong in the sedentary group, which possesses two life stages.  
60 The first is a free-swimming tadpole larva without any extrinsic feeding ability until it  
61 attaches to a substratum. These free-living larvae can attach to many substrates such  
62 as stones, ship hulls, mussels, and seaweed. The sedentary life stage starts after the  
63 attachment is followed by metamorphosis resulting in the loss of chordate features  
64 such as the notochord, external pharyngeal gill slits, nerve cord, and post-anal tail [4].  
65 After metamorphosis, the individual adults, termed zooids, can reproduce asexually  
66 through a weekly asexual budding cycle called blastogenesis [5]. Individuals form buds  
67 from their endothelial epithelium during this cycle, generating new zooids while the  
68 original zooid is absorbed.

69

70 Tunicates are more closely related to the subphylum Vertebrata than  
71 Cephalochordata, and therefore of interest in evolution studies [6]. Botryllid ascidians  
72 additionally have several notable abilities. First, they can undergo whole-body  
73 regeneration (WBR), the ability to form a new adult from a vascular fragment, following  
74 the loss of all zooids [7]. Second, colonies can enter a dormancy period in suboptimal

75 environmental conditions, where all the zooids are absorbed, and only a compact  
76 vasculature is left [8]. Third, natural chimerism, the fusion of two contacting colonies  
77 that share similar histocompatibility alleles, also known as allorecognition, results from  
78 recognising the self from xeno-recognition [9-11]. WBR, blastogenesis,  
79 hibernation/aestivation, and natural chimerism are reported only within the botryllid  
80 ascidians. To date, examples of WBR have been described for *Botrylloides violaceus*,  
81 *Botrylloides diegensis* (formerly assigned as *Botrylloides leachii*), *Botryllus*  
82 *primigenus*, and *Botryllus schlosseri* [4, 12, 13]. *B. diegensis* can regenerate  
83 continuously from a little vascular tissue that includes at least ~200 cells in as little as  
84 10 days [7, 14]. Hibernation/aestivation is also only reported for several botryllids as  
85 *B. diegensis* (reported as *B. leachii*) and *Botrylloides gascoi* thus far [15]. Investigating  
86 these major and minute differences between the tunicate species gives highly  
87 profound information about their evolutionary history.

88

89 Ascidians have been studied ecologically and regularly monitored to understand if they  
90 are indigenous or invasive species, but due to the absence of solid biogeographical or  
91 historical evidence, it is challenging to develop a list for their origin or introductions;  
92 nevertheless, this is important as spatial competition is a vital phenomenon for the  
93 survival of sessile species which can have harmful impacts on native species[16]. Due  
94 to the increase in sea transportation and construction of shipping channels, new  
95 introductions have increased in the last century, altering habitat structures and  
96 biodiversity [17]. For example, *B. schlosseri* and *B. violaceus* are known to be invasive  
97 and reported to affect aquaculture negatively [18]. Once these species are introduced  
98 to a new habitat, they can overgrow and dominate the available spaces, including the  
99 mobile spaces such as the outer layer of crustaceans, which might adversely affect

100 the animal's mobility. *Botrylloides diegensis* (Ritter & Forsyth, 1917) [19] is commonly  
101 seen in the intertidal zone throughout New Zealand's coasts and is thought to have  
102 originated from the Western or Southern Pacific, while *B. leachii* is stated to have  
103 Mediterranean origins [20-23]. *B. diegensis* is thought to be introduced to Atlantic and  
104 Northern Pacific [20, 23], unlike *B. leachii*, which was stated to be non-indigenous for  
105 Australia and Tasmania [24].

106

107 Ascidians contain crypticity due to morphological plasticity and slight differences in  
108 anatomical distinctions between species. The identification of *Botrylloides* species has  
109 been particularly challenging. Their separation from its sister species is unclear due to  
110 a lack of morphological divergence or a defined distance for inter/intra-species  
111 delineation [25, 26]. The sister species which lack this are *Botrylloides leachii*,  
112 *Botrylloides violaceus*, *Botrylloides niger*, or *Botrylloides diegensis* [25-28].  
113 *Botrylloides perspicuus*, *Botrylloides giganteus*, and *Botrylloides pizoni* have similar  
114 colonial and zooidal features, although they are distinct species [29]. The similarities  
115 between these sister botryllid species have resulted in ambiguous identification and  
116 sometimes misidentification, which demonstrates the necessity for clear taxonomical  
117 identification.

118

119 DNA barcoding is a powerful tool and, when combined with morphological data,  
120 enables the identification of species, including genus *Botrylloides* [13, 25, 29-31]. The  
121 selection of molecular markers to estimate the divergence is essential. These studies  
122 often use mitochondrial cytochrome oxidase subunit I (COI), a polymorphic but  
123 conserved region, and other nuclear gene markers such as 12S rRNA, 16S rRNA, 18S  
124 rRNA, and 28S rRNA genes can also be used to increase the resolution of

125 identification [25]. Improving the quality and quantity of database sequences will play  
126 an important role in future barcoding approaches and improving global biodiversity  
127 monitoring. For example, barcoding combined with the morphological investigation  
128 has found that *Ciona robusta* was erroneously assigned as *Ciona intestinalis*, a  
129 different species [32]. In other cases, mitogenomics, a whole mitochondrial barcoding  
130 technique, has been used to separate species. A recent study found that a European  
131 clade of *Botryllus schlosseri* was a new species called *Botryllus gaiae* [33].  
132 Significantly, a recent study suggested all the GenBank sequences of *Botrylloides*  
133 *leachii* were incorrectly assigned, and these sequences belong to *Botrylloides*  
134 *diegensis* [26]. Furthermore, it was stated that the spoked wheel morphology in the  
135 vicinity of the zooidal buccal siphon is present in *B. leachii* but absent in *B. diegensis*.  
136 Considering all these three species are commonly used model invertebrate chordates,  
137 due to their prominent phylogenetic position, makes accurate identification essential.

138

139 Our group studies regeneration in *Botrylloides*, and previously we had assigned this  
140 species as *B. leachii* based on both previous publications and GenBank sequences.  
141 Considering the recent studies, we aimed to use DNA barcoding combined with  
142 morphology to identify *Botrylloides* species from New Zealand coasts. Additionally,  
143 their histocompatibility was analysed via recognition assays to look at similarities  
144 between these closely related species.

145

## 146 **MATERIALS & METHODS**

### 147 **Sampling Area**

148 In total 40 samples were collected from 7 different intertidal zones around New  
149 Zealand (Invercargill, Dunedin, Christchurch, Nelson, Picton, Whangateau, New

150 Plymouth). Samples were preserved in absolute ethanol, and the samplings were  
151 performed from July 2020 to February 2021 (Table S1). Samples were taken from the  
152 first few meters of the ocean surface except for a couple of samples acquired from  
153 different depths via diving. The collection was based on morphological identification at  
154 the sampling sites based on the general knowledge of botryllid ascidian morphology.  
155 A colony fragment is taken using a single-edged razor blade. For animal breeding,  
156 living tunicate tissue fragments are attached to 5x7.5 cm glass slides [34]. The slides  
157 are located in tanks filled with filtered saltwater that is constantly aerated. Animals are  
158 fed regularly with a shellfish diet, and their water is replaced every two days.

159

### 160 **Morphological Examination**

161 Collected botryllid ascidians were photographed and examined morphologically for the  
162 zooid arrangement and colour under the light microscope. The size of the colony and  
163 the zooids were measured. Live colonies were monitored regularly.

164

### 165 **Molecular Analysis**

166 DNA extraction was performed based on Gemmell and Akiyama [35]. The alcohol was  
167 removed from the samples, and 300 µl lysis buffer (100 mM NaCl, 50 mM TrisCl, 1%  
168 SDS, 50 mM EDTA pH 8) was added to each tube. Proteinase K (20 mg/ml) was  
169 added to a final concentration of 100 µg/ml. The colonies were homogenised and left  
170 to incubate for 2 h at 50°C. Following tissue digestion, 300 µl of 5 M LiCl was added  
171 to the tubes. The lysate was mixed for 1 min through inversion. Next, 600 µl of  
172 chloroform was added, and the samples were left on a rotating wheel for 30 min. The  
173 samples were spun for 15 min at max speed. The supernatant was placed in a new  
174 tube. Two volumes of absolute ethanol were added to the tubes and were inverted

175 several times. DNA was precipitated by centrifuging at max speed for 30 min. The  
176 supernatant was discarded, and the pellet was washed with 70% ethanol and  
177 centrifuged at max speed for 5 min. Excess ethanol was removed, and the pellets  
178 were left to air dry for 10 min. Finally, 100-200  $\mu$ l TE buffer (10 mM TrisCl, 1 mM EDTA  
179 – pH 7.5) was used to resuspend the pellet, and the tubes were left overnight  
180 at 4°C. DNA samples were stored at -20°C.

181

182 DreamTaq Green PCR Master Mix (ThermoFisher) was used with 10 ng/ $\mu$ l of diluted  
183 DNA. PCR was performed as following: 1) Denaturation: 95°C – 3min 2) Annealing:  
184 95°C – 30sec, 55°C – 30sec, 72°C – 1min for 35 times 3) Extension: 72°C – 10min.  
185 The primers used in this study are given in Table 1. Tun1 primer set is adapted from  
186 Folmer, Black [36]. Tun2 primers are taken from Stefaniak, Lambert [37]. 18S, 28S,  
187 H3 primer sequences are adapted from Reem, Douek [25].

188

189 All PCR products are cleaned with ExoSAP-IT™ PCR Product Cleanup Reagent. 5  
190  $\mu$ l of post-PCR product is mixed with 2  $\mu$ l of ExoSAP reagent and incubated at 37°C  
191 for 15 minutes and then 80°C for 15 min. Cleaned samples were sequenced by Otago  
192 University Sequencing Facility. The tubes were prepared as 3.2 pmol of 1  $\mu$ l forward  
193 primer and 4  $\mu$ l of cleaned post-PCR template per sample.

194

195 Sequences are aligned, edited, and trimmed using BioEdit version 7 per marker [38].  
196 COI haplotypes are demonstrated using NETWORK version 10 with the median-  
197 joining algorithm [39]. Bayesian probabilities and branch lengths were acquired for  
198 COI locus via MrBayes 3.2 [40]. The Bayesian tree was optimized using FigTree 1.4.4  
199 [41].



200 For comparative analysis, *Botrylloides* sequences from GenBank were also added to  
201 the Network and Phylogenetic analyses. For bayesian phylogeny, we used the present  
202 GenBank *Botrylloides* COI sequences (Supplementary File). Besides mitochondrial  
203 marker COI, three other nuclear regions Histone 3 (H3), 18S, and 28S, were analysed.  
204 Based on H3, 18S, and 28S, bayesian trees were constructed.

205

## 206 **Recognition Assay**

207 Recognition assay tests self-nonsel discrimination. Two colonies can fuse when they  
208 share at least one allele at a highly polymorphic Fu/HC locus (allorecognition) similar  
209 to the MHC locus in humans. The absence of common alleles results in non-fusion  
210 (xenorecognition). Two botryllid colonies of different morphs were placed beside each  
211 other on the slide where their growing ampullae could interact. After placing the  
212 colonies, they were left in a moist chamber for 30 min. Then, the colonies were put  
213 back into aerated tanks. Within the next day, the interaction between colonies could  
214 be seen as their ampullae contacted. Colonies were monitored under Olympus light  
215 microscope using CellSens Software.

216

## 217 **RESULTS**

### 218 **Morphological observations**

219 *Botrylloides* zooids are lined side by side as branching double row systems, also called  
220 "*leachii*" type, with their dorsal lamina faces the surrounding environment. Different *B.*  
221 *diegensis* morphs from New Zealand coasts were observed, including orange, brown-  
222 orange, brown, and brown-white or purple-white (Fig. 1). It is difficult to differentiate  
223 the brown-white morph from purple-white in some cases; thus, they might be the same  
224 or different, or can be a transition morph. The zooid sizes and the area of the zooids

225 of *B. diegensis* and *B. affinis anceps* are very similar (~130  $\mu\text{m}$  length & ~7500  $\mu\text{m}^2$   
226 area) (Fig. 2A, B, D, E, F). while zooids of *B. jacksonianum* are larger in size and area  
227 (~160  $\mu\text{m}$  & ~12800  $\mu\text{m}^2$ ) (Fig. 2C, E, F). The shapes of the zooids are similar within  
228 *B. diegensis* and *B. affinis anceps*, elliptical egg-like individuals (Fig. 2A, B, D) while  
229 *B. jacksonianum* zooids are more nodal and finger-like towards the atrial tongue (Fig.  
230 2C). All zooids are equal in tentacle numbers (4 large, 4 smaller, and 8 smallest) (Fig.  
231 2A-D). There are white-pigmented cells on the tentacles of *B. jacksonianum* (Fig. 2C).  
232 The two largest-lateral tentacles are distinct at the buccal siphon of *B. affinis anceps*  
233 (Fig. 2D).

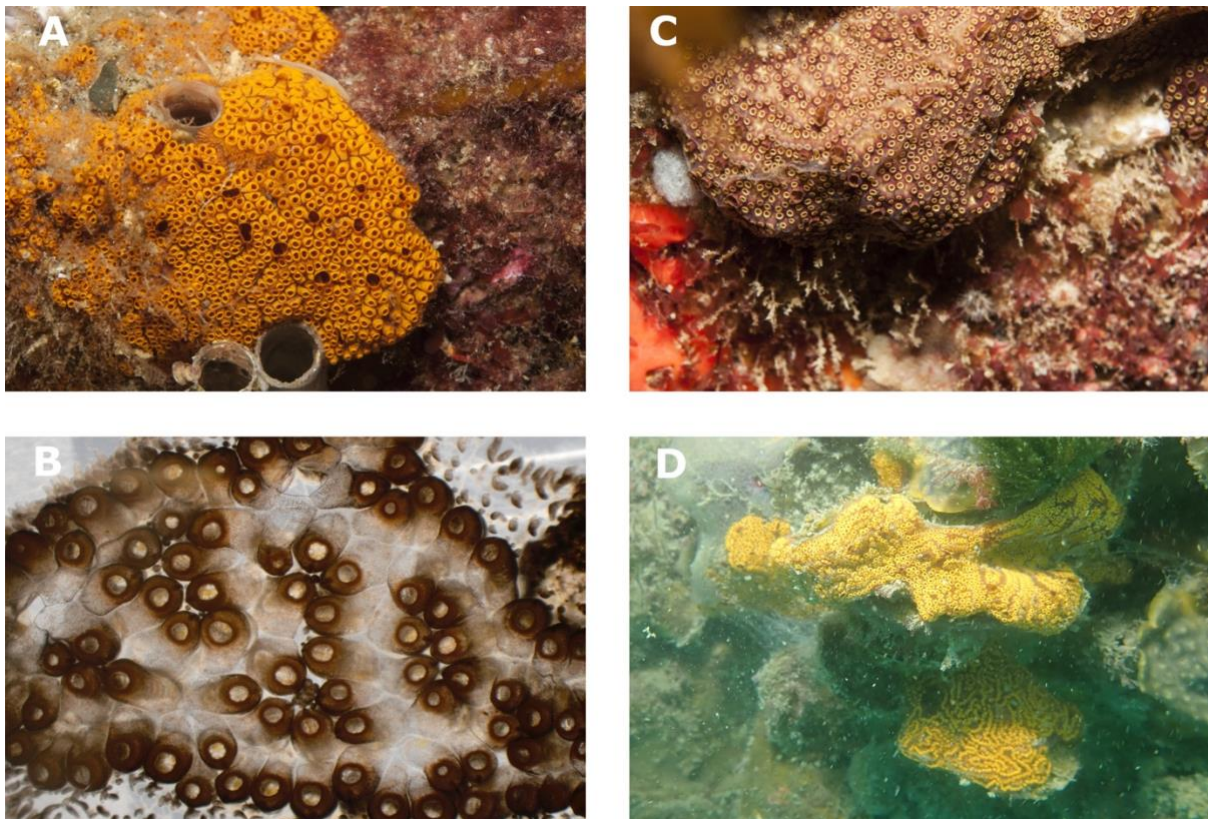

234

235 **Figure 1. Different colour morphs of *Botrylloides diegensis* from Aotearoa New Zealand. A) Common**  
236 **orange morph. B) A brown-orange *B. diegensis* colony. C) Brown-white morph. D) Brown-orange colony.**

237

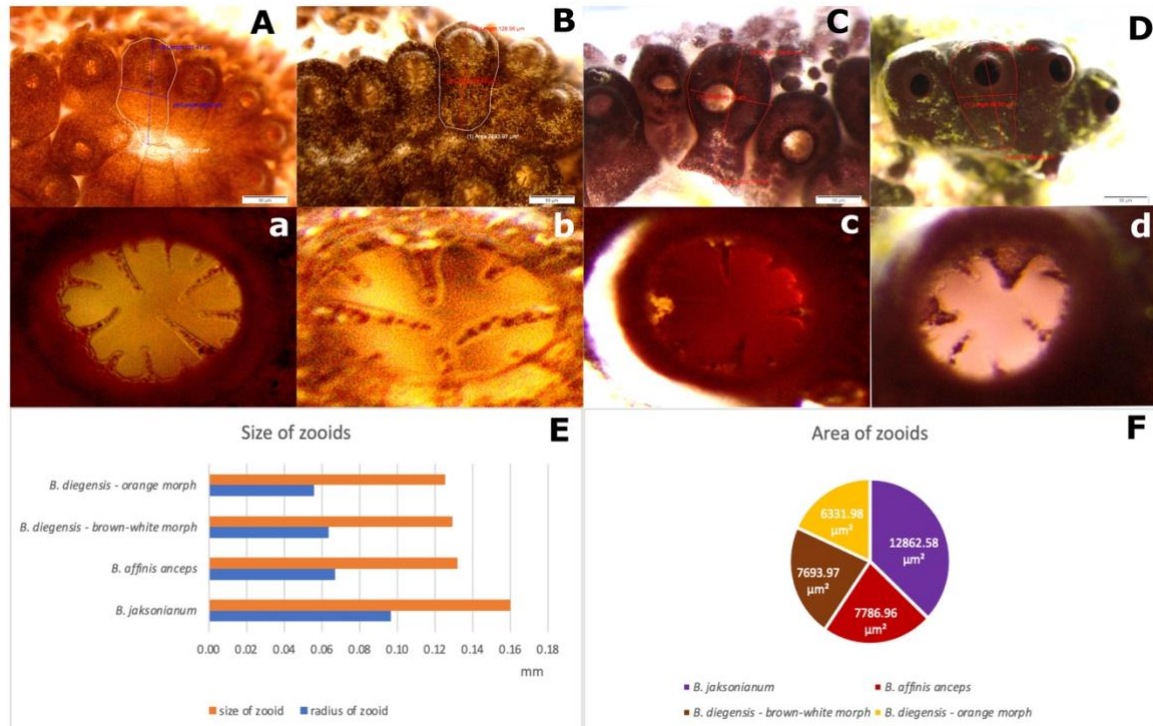

238

239 **Figure 2. Differences in zooidal size and morphologies of Botryllid species** **A)** Zooid of the orange  
240 morph of *B. diegensis*. **a)** Tentacles of the orange morph of *B. diegensis* **B)** Zooid of the brown-white *B.*  
241 *diegensis* colony. **b)** Tentacles of brown-white *B. diegensis*. **C)** Zooid of *B. jacksonianum* **c)** Tentacles of *B.*  
242 *jacksonianum*. **D)** Zooid of *B. affinis anceps* **d)** Tentacles of *B. affinis anceps*. **E)** Bar chart summarising the  
243 size and radius of different botryllid zooids. **F)** Pie chart represents the area of the given zooids. Example  
244 measurements are shown in the earlier panels A-D.

245

## 246 Genetic analysis of haplotype diversity

247 Seven haplotypes were found based on the clustering of the COI Network from the 7  
248 sampling locations (Fig. 3). The distance values (0.2-1%) of the sequences support  
249 their identification as *B. leachii* or *B. diegensis* based on the COI species delineation  
250 threshold (<2%) [42] compared to database sequences based on BLAST mismatch  
251 ratio.

252

253 Additionally, three samples from Whangateau, Dunedin, and Invercargill were  
254 determined to be distinct species based on their evolutionary distances (Fig. 3). A  
255 phylogeny based on COI locus was constructed to evaluate their taxonomy (Fig. 4).

256 Whangateau and Invercargill colonies clustered with *B. cf. anceps* COI barcode  
257 sequence from Australia (Accession no: MT873573) and the botryllid sample from  
258 Dunedin grouped within *B. jacksonianum* from Australia (Accession no: MT873572).  
259 While the distance is high within the *B. anceps* cluster and thus identified as *B. affinis*  
260 *anceps*, the botryllid species from Dunedin is nominated as *B. jacksonianum* due to  
261 the low mismatch ratio (<1%). The rest of the sequences clustered with *B. diegensis*  
262 sequences from GenBank (Fig. 4).

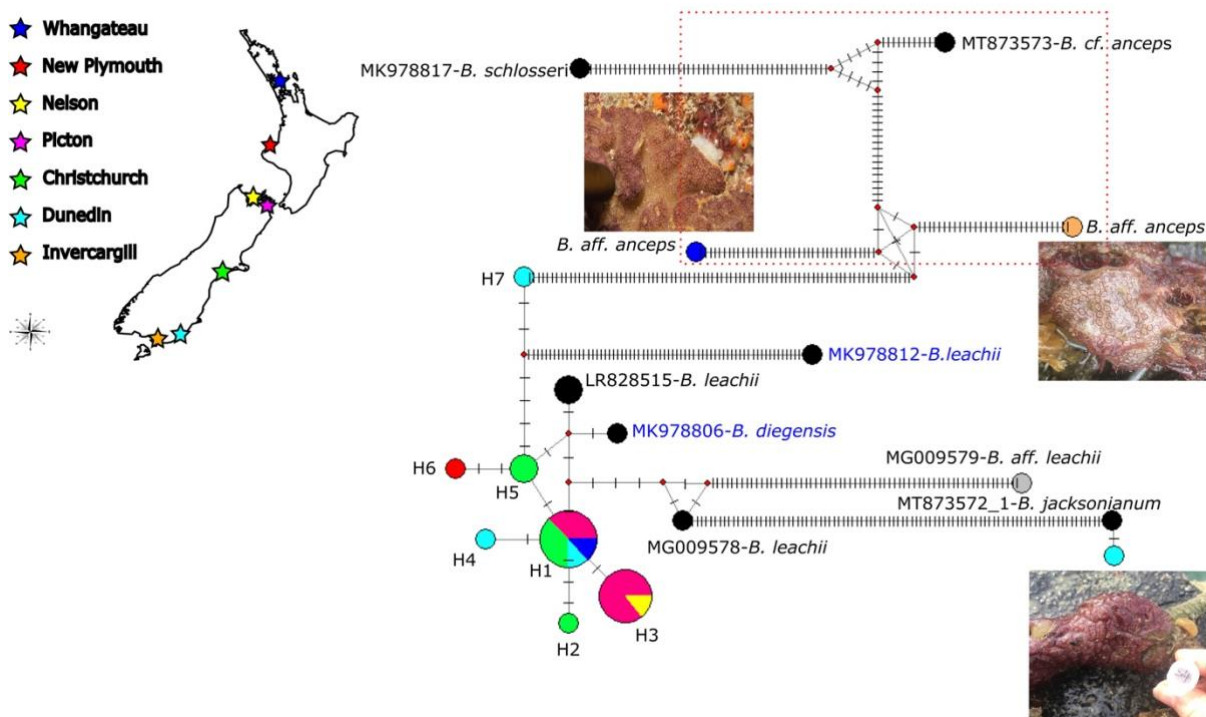

263

264

265 **Figure 3. Phylogeography of the New Zealand Botryllid ascidians.** Stripes on lines indicate the mutation  
266 steps between the haplotypes. Size differences of circles represent frequency. Colors marked the regions  
267 where the samples were collected as given in the map (Turquoise: Dunedin, Green: Christchurch, Orange:  
268 Invercargill, Yellow: Nelson, Pink: Picton, Blue: Whangateau, Red: New Plymouth). Analyzed partial COI  
269 sequences are 647 bp. Grey and black circles indicate the database haplotypes. Black is for *B.*  
270 *diegensis/leachii*, grey is for *B. aff. leachii* from the GenBank. Blue writings demonstrate *B. diegensis*  
271 sequences specifically. *B. anceps* cluster is highlighted with a red dotted line.

272

273

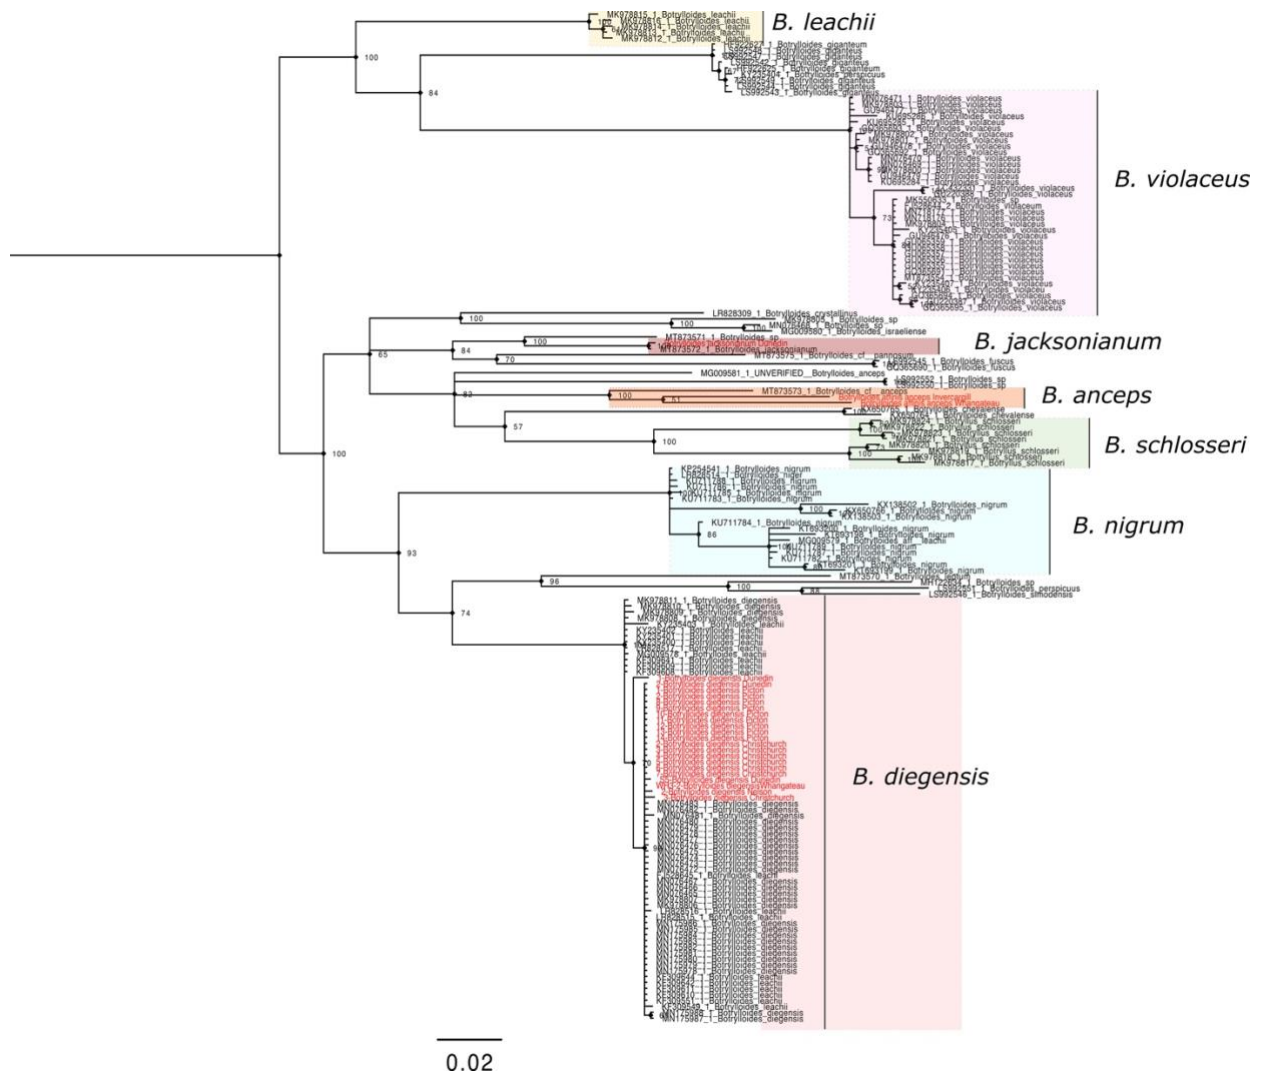

274

0.02

275 **Figure 4. Bayesian tree of *Botrylloides* based on mitochondrial COI locus.** Current study sequences  
276 and all database *Botrylloides* sequences from GenBank were used to construct the tree. Two independent  
277 runs were executed with Monte-Carlo Markov Chains. Ten million generations were measured, and the  
278 sampling frequency was 1000 for each generation. Split frequencies were lower than 0.01. Red sequences  
279 indicate the current study sequences.

280

281 Besides mitochondrial marker COI, three other nuclear regions as Histone 3 (H3), 18S,  
282 and 28S were analysed. Based on H3, 18S, and 28S, bayesian trees were constructed  
283 (Fig. 5). The H3 tree (Fig. 5A) confirms the clustering of the New Zealand samples  
284 with previous samples labeled as *B. leachii* (*B. diegensis*). Furthermore, the low  
285 mismatch ratio (<1%) with database *B. leachii* (*B. diegensis*) sequences based on

286 18S, and 28S barcodes further confirm the identification of current study sequences  
287 as *B. diegensis* (Fig. 5B, C). Moreover, *B. jacksonianum* from Dunedin is more distant  
288 to *B. diegensis* from Dunedin based on H3 compared to 18S, while *B. affinis anceps*  
289 from Whangateau is farther from the *Botrylloides anceps* from Israel (indicated as  
290 unverified on GenBank) based on 28S.

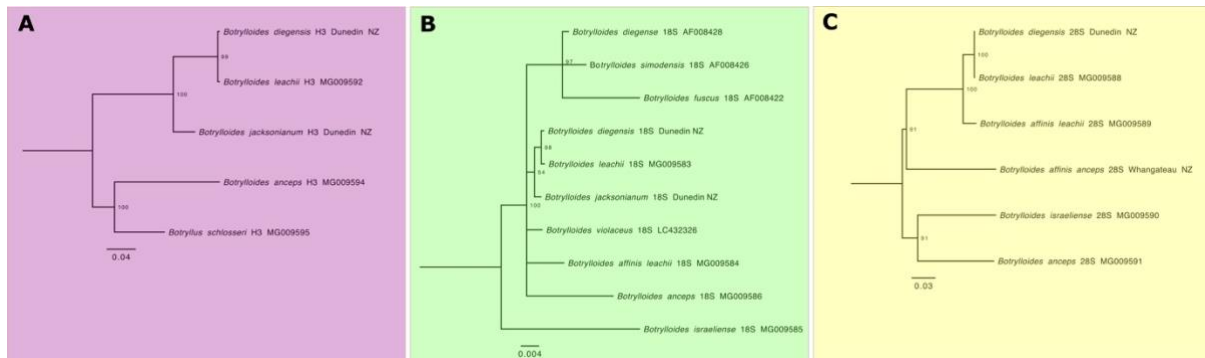

291

292 **Figure 5. Bayesian trees based on nuclear markers** A) Tree is based on Histone 3 B) Phylogeny is based  
293 on 18S ribosomal subunit gene C) 28S ribosomal subunit tree. Phylogenies are constructed with the study  
294 sequences and all database *Botrylloides* sequences from GenBank. Two independent runs were executed  
295 with Monte-Carlo Markov Chains. Ten million generations were measured, and the sampling frequency was  
296 1000 for each generation. Split frequencies were lower than 0.01. Numbers on the tree indicate the  
297 bootstrap frequencies.

298

### 299 Colony Histocompatibility

300 Two colonies can fuse when they both carry at least one allele at a highly polymorphic  
301 Fu/HC locus. This is commonly seen among botryllids called natural chimerism as an  
302 evolutionary advantage to recognize genetically similar ones from the distant colonies.  
303 While the organism is generally competing for space with the distant or the different,  
304 chimerism allows for reconnection, so enables the similar ones to become one again  
305 and increase in size instead of competing. To qualitatively analyse the  
306 histocompatibility of two colonies based on the ability to fuse, different morphs of *B.*  
307 *diegensis* were located closely so their ampullae could interact. The brown and brown-

308 orange *B. diegensis* morphs resulted in a non-fusion reaction (Fig. 6). Necrotic spot  
309 formation was observed during day 3 of the interaction as an indicator of the non-  
310 fusion response. This indicates these two systems are different from each other based  
311 on Fu/Hc locus with their blood cells resisting each other instead of fusing and  
312 becoming a continuous circulatory system. The second recognition assay was  
313 conducted between orange and purple-white morphs (Fig. 7). This assay resulted in  
314 the non-interaction of the colonies as the ampullae of two morphs interacted and their  
315 ampullae are contracted back from each other instead of continuing to interact.  
316

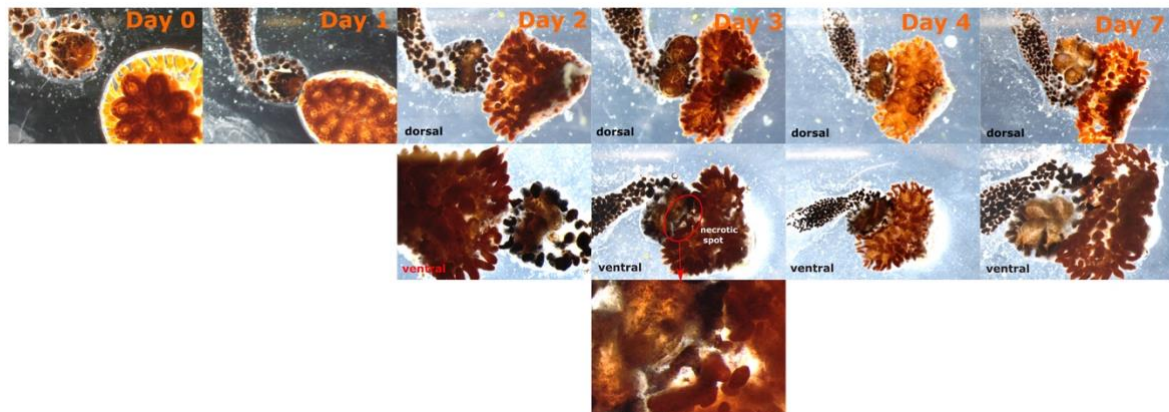

317  
318  
319 **Figure 6. Histocompatibility of different *B. diegensis* morphs.** Non-fusion of orange and brown-orange  
320 colonies. The interaction was monitored for seven days. The interaction was initiated by the elongation of  
321 ampullae. The necrotic spots were detected in between the contact points where the ampullae interacted.

322  
323  
324  
325  
326  
327  
328  
329

330

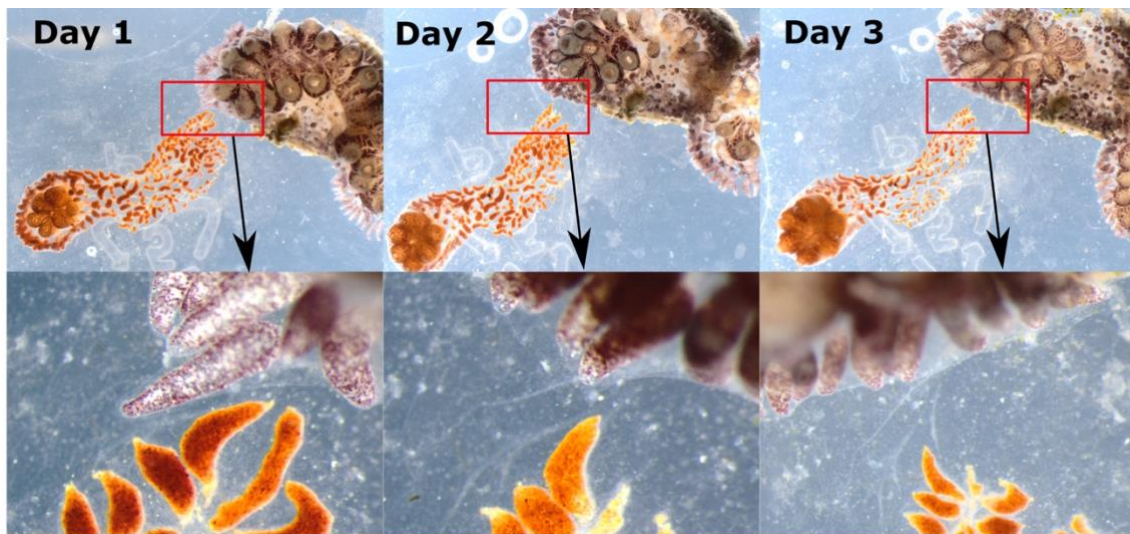

331

332 **Figure 7. Xeno-recognition in *B. diegensis* morphs.** Non-interaction of orange and purple-white morphs.

333 Interactions were monitored for three days. The interaction was initiated by the elongation of ampullae.

334 The ampullae of the two systems moved away in the following days.

335

## 336 DISCUSSION

337 *Botrylloides* colonies were collected from seven different regions of the North, and

338 South Island of New Zealand and phylogenetic analysis was based on mitochondrial

339 and nuclear markers. Due to the absence of the spoked wheel morphology and based

340 on the comparative molecular results, most of the collected samples from New

341 Zealand are identified as *Botrylloides diegensis* [26]. For this reason, the previously

342 reported studies from our lab that denoted our model organism as *Botrylloides leachii*

343 are *Botrylloides diegensis* [4, 14, 34, 43, 44].

344

345 Two other *Botrylloides* species collected are the first molecular records from New

346 Zealand: *Botrylloides jacksonianum* and *Botrylloides affinis anceps*. The species from

347 Whangateau was assigned as *B. aff. anceps* due to its high molecular affinity to the

348 record from Australia (GenBank Accession No: MT873573) [28]. Although we were



349 not able to obtain a detailed anatomical comparison for both these records, our result  
350 looks coherent, particularly on the determination of *B. anceps* as it is previously stated  
351 to be indigenous to the Indo-Pacific region [27]. The presence of two larger lateral  
352 tentacles given for *B. anceps* from Israel also confirms the genetic affinity regarding  
353 our assignment [27]. Besides a recent study, there is no recently reported record of *B.*  
354 *jacksonianum* [28]. The authors stated that *B. jacksonianum* which was synonymized  
355 with *B. leachii* by Kott [45, 46] is not accurate and essentially a distinct species. Our  
356 network construction and phylogenetic tree based on COI also validates as it is a  
357 separate species. They also indicated the Folmer's fragments are insufficient for  
358 amplifying the COI region of botryllid ascidians. A similar problem arose with the  
359 barcoding of *B. aff. anceps* and *B. jacksonianum*, which was overcome by cloning  
360 these regions into a plasmid vector and then sequencing.

361

362 Colonies are not collected in a sterile environment as they come from the ocean, so  
363 the isolated DNA often contains the DNA of other organisms such as algae, bacteria,  
364 and nearby organisms from the same substratum or the organism itself is attached to  
365 them. This means barcoding of these animals is often not easy and can result in  
366 contamination. A new primer pair called 860-COI was designed to control for these  
367 issues [28, 47]. It provides sufficient resolution for the barcoding of botryllid ascidians  
368 even if they are cryptic or a new species. However, as the 860-COI primer was efficient  
369 to amplify the COI barcode, we were not able to elongate the sequence and thus only  
370 used the Folmer's region.

371

372 As a single monophyletic cluster, we observed seven different haplotypes from the  
373 New Zealand coasts. Although a small population of the species was barcoded, a

374 relatively higher number of haplotypic variations were recorded from Dunedin. No  
375 phylogeographic divergence within these colonies was recorded. The highest  
376 nucleotide variation was observed within COI barcodes and H3, also providing an  
377 adequate resolution for the species delineation. 18S and 28S had low resolution  
378 compared to COI and H3. No sequence variation was observed among the nuclear  
379 markers.

380

381 We found the zooid sizes of *B. diegensis* and *B. aff. anceps* is similar while *B.*  
382 *jacksonianum* was bigger. As a general observation, we commonly found *B. diegensis*  
383 during the summertime. However, *B. jacksonianum* was observed more often during  
384 the winter during our regular samplings in Dunedin.

385

386 As compatible with the formerly reported orange colonies, dichromatic morphs of *B.*  
387 *diegensis* can undergo whole-body regeneration which takes approximately twelve  
388 days [34, 43]. Dichromatic and monochromatic colonies of *B. diegensis* were not  
389 histocompatible due to the non-fusion reaction. The necrotic spot formation in between  
390 the contact points supports the non-histocompatibility observation. The non-interaction  
391 of the colonies may be explained more of a behavioral scope as these colonial systems  
392 seem to choose alternative actions instead of competing or joining each other.

393

394 Overall, our findings suggest that COI is a reliable marker in terms of botryllid ascidian  
395 identification. Among nuclear markers, H3 is adequately resolving the species  
396 taxonomy compared to 18S and 28S. For our previous publications, we had checked  
397 our COI barcodes which matched at the time with the *B. leachii* sequences in the  
398 GenBank database. Since then, these sequences were determined as incorrectly

399 annotated and belong to *B. diegensis*. As one of the first barcoding studies on botryllid  
400 ascidians from New Zealand, this study represents valuable insights into *Botrylloides*  
401 species diversity. In total, we found three *Botrylloides* species which are *Botrylloides*  
402 *diegensis*, *Botrylloides jacksonianum*, and *Botrylloides affinis anceps* which are all  
403 indigenous to the Pacific indicating an absence of a new introduction.

404

#### 405 DATA AVAILABILITY

406 The haplotype sequences are uploaded to the GenBank nucleotide database. The  
407 accession numbers can be found in the Supplementary File.

408

#### 409 ACKNOWLEDGEMENTS

410 We would like to thank Richard Taylor from University of Auckland who kindly provided  
411 samples from Whangateau. We would also like to thank Dr. Michael Meier for the help  
412 during samplings. Finally, we thank to Stephanie Workman for comments on earlier  
413 drafts. This study is supported by the Royal Society of New Zealand Marsden fund  
414 grant (UOO1713). B Temiz was supported by the Anatomy Department PhD  
415 scholarship by the University of Otago.

416

#### 417 COMPETING INTERESTS

418 The authors declare no competing interests.

419

#### 420 REFERENCES

- 421 1. Shenkar, N. and B.J. Swalla, *Global diversity of Ascidiacea*. PLoS One, 2011. **6**(6): p.  
422 e20657.
- 423 2. Kocot, K.M., M.G. Tassia, K.M. Halanych, and B.J. Swalla, *Phylogenomics offers*  
424 *resolution of major tunicate relationships*. Molecular Phylogenetics and Evolution,  
425 2018. **121**: p. 166-173.

- 426 3. Belton, P.S., S.F. Tanner, N. Cartier, and H. Chanzy, *High-Resolution Solid-State C-13*  
427 *Nuclear Magnetic-Resonance Spectroscopy of Tunicin, an Animal Cellulose.*  
428 *Macromolecules*, 1989. **22**(4): p. 1615-1617.
- 429 4. Blanchoud, S., B. Rinkevich, and M.J. Wilson, *Whole-Body Regeneration in the*  
430 *Colonial Tunicate Botrylloides leachii.* *Results Probl Cell Differ*, 2018. **65**: p. 337-355.
- 431 5. Berrill, N.J., *The developmental cycle of Botrylloides.* *Q J Microsc Sci*, 1947. **88**(Pt 4):  
432 p. 393-407.
- 433 6. Delsuc, F., H. Brinkmann, D. Chourrout, and H. Philippe, *Tunicates and not*  
434 *cephalochordates are the closest living relatives of vertebrates.* *Nature*, 2006.  
435 **439**(7079): p. 965-8.
- 436 7. Rinkevich, B., Z. Shlemberg, and L. Fishelson, *Whole-body protochordate*  
437 *regeneration from totipotent blood cells.* *Proc Natl Acad Sci U S A*, 1995. **92**(17): p.  
438 7695-9.
- 439 8. Burighel, P., R. Brunetti, and G. Zaniolo, *Hibernation of the Colonial Ascidian*  
440 *Botrylloides Leachi (Savigny): Histological Observations.* *Bollettino di zoologia*, 1976.  
441 **43**(3): p. 293-301.
- 442 9. Rinkevich, B., *Natural chimerism in colonial urochordates.* *Journal of Experimental*  
443 *Marine Biology and Ecology*, 2005. **322**(2): p. 93-109.
- 444 10. Rinkevich, Y., J. Douek, O. Haber, B. Rinkevich, and R. Reshef, *Urochordate whole*  
445 *body regeneration inaugurates a diverse innate immune signaling profile.*  
446 *Developmental Biology*, 2007. **312**(1): p. 131-146.
- 447 11. Manni, L., C. Anselmi, F. Cima, F. Gasparini, A. Voskoboynik, M. Martini, . . . L.  
448 Ballarin, *Sixty years of experimental studies on the blastogenesis of the colonial*  
449 *tunicate Botryllus schlosseri.* *Developmental Biology*, 2019. **448**(2): p. 293-308.
- 450 12. Rosner, A., O. Kravchenko, and B. Rinkevich, *IAP genes partake weighty roles in the*  
451 *astogeny and whole body regeneration in the colonial urochordate Botryllus*  
452 *schlosseri.* *Developmental Biology*, 2019. **448**(2): p. 320-341.
- 453 13. Ozturk, E., B. Temiz, and A. Karahan, *First record of non-indigenous Botrylloides*  
454 *anceps (Herdman, 1891) species along the Turkish Levantine Coasts, Confirmed by*  
455 *DNA Barcoding.* *Isj-Invertebrate Survival Journal*, 2020. **17**: p. 30-30.
- 456 14. Blanchoud, S., K. Rutherford, L. Zondag, N.J. Gemmell, and M.J. Wilson, *De novo*  
457 *draft assembly of the Botrylloides leachii genome provides further insight into*  
458 *tunicate evolution.* *Sci Rep*, 2018. **8**(1): p. 5518.
- 459 15. Kurn, U., S. Rendulic, S. Tiozzo, and R.J. Lauzon, *Asexual Propagation and*  
460 *Regeneration in Colonial Ascidiens.* *Biological Bulletin*, 2011. **221**(1): p. 43-61.
- 461 16. Zhan, A., E. Briski, D.G. Bock, S. Ghabooli, and H.J. MacIsaac, *Ascidiens as models for*  
462 *studying invasion success.* *Marine Biology*, 2015. **162**(12): p. 2449-2470.
- 463 17. Carman, M.R., J.A. Morris, R.C. Karney, and D.W. Grunden, *An initial assessment of*  
464 *native and invasive tunicates in shellfish aquaculture of the North American east*  
465 *coast.* *Journal of Applied Ichthyology*, 2010. **26**: p. 8-11.
- 466 18. Karahan, A., J. Douek, G. Paz, and B. Rinkevich, *Population genetics features for*  
467 *persistent, but transient, Botryllus schlosseri (Urochordata) congregations in a*  
468 *central Californian marina.* *Molecular Phylogenetics and Evolution*, 2016. **101**: p. 19-  
469 31.
- 470 19. Ritter, W.E., Forsyth, R. A., *Ascidiens of the littoral zone of southern California.* 1917:  
471 University of California Press.

- 472 20. Viard, F., Roby, C., Turon, X., Bouchemousse, S., Bishop, J., *Cryptic Diversity and*  
473 *Database Errors Challenge Non-indigenous Species Surveys: An Illustration With*  
474 *Botrylloides spp. in the English Channel and Mediterranean Sea*. *Frontiers in Marine*  
475 *Science*, 2019. **6**.
- 476 21. Page, M., Kelly, M., *Awesome Ascidiaceans: A Guide to the Sea Squirts of New Zealand*.  
477 2013.
- 478 22. Page, M., Willis, T.J., Handley, S.J., *The colonial ascidian fauna of Fiordland, New*  
479 *Zealand, with a description of two new species*. *Journal of Natural History*, 2014.  
480 **48(27-28)**: p. 1653-1688.
- 481 23. Carlton, J.T., *Deep invasion ecology and the assembly of communities in historical*  
482 *time*. *Biological Invasions in Marine Ecosystems*, ed. G.R.J.A. Crooks. 2009, Berlin:  
483 Springer.
- 484 24. Shenkar, N., Swalla, B. J., *Global diversity of Ascidiacea*. *PLoS One*, 2011. **6(6)**: p.  
485 e20657.
- 486 25. Reem, E., J. Douek, and B. Rinkevich, *Ambiguities in the taxonomic assignment and*  
487 *species delineation of botryllid ascidians from the Israeli Mediterranean and other*  
488 *coastlines*. *Mitochondrial DNA Part A*, 2018. **29(7)**: p. 1073-1080.
- 489 26. Viard, F., C. Roby, X. Turon, S. Bouchemousse, and J. Bishop, *Cryptic Diversity and*  
490 *Database Errors Challenge Non-indigenous Species Surveys: An Illustration With*  
491 *Botrylloides spp. in the English Channel and Mediterranean Sea*. *Frontiers in Marine*  
492 *Science*, 2019. **6**.
- 493 27. Brunetti, R., *Botryllid species (Tunicata, Ascidiacea) from the Mediterranean coast of*  
494 *Israel, with some considerations on the systematics of Botryllinae*. *Zootaxa*,  
495 2009(2289): p. 18-32.
- 496 28. Salonna, M., F. Gasparini, D. Huchon, F. Montesanto, M. Haddas-Sasson, M. Ekins, . .  
497 . C. Gissi, *An elongated COI fragment to discriminate botryllid species and as an*  
498 *improved ascidian DNA barcode*. *Sci Rep*, 2021. **11(1)**: p. 4078.
- 499 29. Rocha, R.M., M. Salonna, F. Griggio, M. Ekins, G. Lambert, F. Mastrototaro, . . . C.  
500 Gissi, *The power of combined molecular and morphological analyses for the genus*  
501 *Botrylloides: identification of a potentially global invasive ascidian and description of*  
502 *a new species*. *Systematics and Biodiversity*, 2019. **17(5)**: p. 509-526.
- 503 30. Temiz, B., E. Ozturk, and A. Karahan, *Phylogenetic and phylogeographic resolution of*  
504 *Botrylloides leachii (Savigny, 1816) in Northeastern Mediterranean*. *Isj-Invertebrate*  
505 *Survival Journal*, 2020. **17**: p. 29-29.
- 506 31. Miralles, L., A. Ardura, A. Arias, Y.J. Borrell, L. Clusa, E. Dopico, . . . E. Garcia-Vazquez,  
507 *Barcodes of marine invertebrates from north Iberian ports: Native diversity and*  
508 *resistance to biological invasions*. *Marine Pollution Bulletin*, 2016. **112(1-2)**: p. 183-  
509 188.
- 510 32. Brunetti, R., C. Gissi, R. Pennati, F. Caicci, F. Gasparini, and L. Manni, *Morphological*  
511 *evidence that the molecularly determined Ciona intestinalis type A and type B are*  
512 *different species: Ciona robusta and Ciona intestinalis*. *Journal of Zoological*  
513 *Systematics and Evolutionary Research*, 2015. **53(3)**: p. 186-193.
- 514 33. Brunetti, R., F. Griggio, F. Mastrototaro, F. Gasparini, and C. Gissi, *Toward a*  
515 *resolution of the cosmopolitan Botryllus schlosseri species complex (Ascidiacea,*  
516 *Styelidae): mitogenomics and morphology of clade E (Botryllus gaiae)*. *Zoological*  
517 *Journal of the Linnean Society*, 2020. **190(4)**: p. 1175-1192.

- 518 34. Zondag, L., Rutherford, K., Gemmell, N. J., Wilson, M. J., *Uncovering the pathways*  
519 *underlying whole body regeneration in a chordate model, Botrylloides leachi using de*  
520 *novo transcriptome analysis*. BMC Genomics, 2016. **17**: p. 114.
- 521 35. Gemmell, N.J. and S. Akiyama, *An efficient method for the extraction of DNA from*  
522 *vertebrate tissues*. Trends Genet, 1996. **12**(9): p. 338-9.
- 523 36. Folmer, O., M. Black, W. Hoeh, R. Lutz, and R. Vrijenhoek, *DNA primers for*  
524 *amplification of mitochondrial cytochrome c oxidase subunit I from diverse metazoan*  
525 *invertebrates*. Mol Mar Biol Biotechnol, 1994. **3**(5): p. 294-9.
- 526 37. Stefaniak, L., G. Lambert, A. Gittenberger, H. Zhang, S. Lin, and R.B. Whitlatch,  
527 *Genetic conspecificity of the worldwide populations of Didemnum vexillum Kott,*  
528 *2002*. Aquatic Invasions, 2009. **4**(1): p. 29-44.
- 529 38. Hall, T.A., *BioEdit: A User-Friendly Biological Sequence Alignment Editor and Analysis*  
530 *Program for Windows* 1999.
- 531 39. Bandelt, H.J., P. Forster, and A. Rohl, *Median-joining networks for inferring*  
532 *intraspecific phylogenies*. Molecular Biology and Evolution, 1999. **16**(1): p. 37-48.
- 533 40. Ronquist, F., M. Teslenko, P. van der Mark, D.L. Ayres, A. Darling, S. Hohna, . . . J.P.  
534 Huelsenbeck, *MrBayes 3.2: efficient Bayesian phylogenetic inference and model*  
535 *choice across a large model space*. Syst Biol, 2012. **61**(3): p. 539-42.
- 536 41. Rambaut, A. *FigTree v1.4.4*. 2018; Available from:  
537 <https://github.com/rambaut/figtree>.
- 538 42. Hebert, P.D., S. Ratnasingham, and J.R. deWaard, *Barcoding animal life: cytochrome*  
539 *c oxidase subunit 1 divergences among closely related species*. Proc Biol Sci, 2003.  
540 **270 Suppl 1**: p. S96-9.
- 541 43. Blanchoud, S., L. Zondag, M.D. Lamare, and M.J. Wilson, *Hematological Analysis of*  
542 *the Ascidian Botrylloides leachii (Savigny, 1816) During Whole-Body Regeneration*.  
543 Biol Bull, 2017. **232**(3): p. 143-157.
- 544 44. Zondag, L., Clarke, R., Wilson, M. J., *Histone deacetylase activity is required for*  
545 *Botrylloides leachii whole-body regeneration*. J Exp Biol, 2019. **222**(Pt 15).
- 546 45. Kott, P., *The Australian Ascidiacea. Part 1, Phlebobranchia and Stolidobranchi*, in  
547 *Memoirs of the Queensland Museum*. 1985, Queensland Museum,: Brisbane,  
548 Australia. p. 1-439.
- 549 46. Kott, P., *Catalogue of Tunicata in Australian waters / P. Kott*, ed. S. Australian  
550 Biological Resources. 2005, Canberra: Australian Biological Resources Study.
- 551 47. Brunetti, R., L. Manni, F. Mastrototaro, C. Gissi, and F. Gasparini, *Fixation, description*  
552 *and DNA barcode of a neotype for <i>Botryllus schlosseri</i>(Pallas, 1766) (Tunicata,*  
553 *Ascidiacea)*. Zootaxa, 2017. **4353**(1): p. 29-50.

555

556

557 TABLES

558 **Table 1.** Primer sequences, annealing temperature, expected product length for

559 *COI, H3, 18S, and 28S* target genes used in this study.

| Primer name     | Primer sequence              | Ann. Temp.<br>(°C) | Product<br>length (bp) | Analysed<br>length (bp) | Reference            |
|-----------------|------------------------------|--------------------|------------------------|-------------------------|----------------------|
| Tun1_F/LCOI1490 | GGTCAACAAATCATAAAGATATTGG    | 55                 | ~650                   | 647                     | Folmer et al 1994    |
| Tun1_R/HCO2198  | TAAACTTCAGGGTGACCAAAAAATCA   | 55                 | ~650                   | 647                     | Folmer et al 1994    |
| Tun_F           | TCGACTAATCATAAAGATATTA       | 55                 | ~650                   | 647                     | Stefaniak et al 2009 |
| Tun_R           | AACTTGATTTAAATTACGATC        | 55                 | ~650                   | 647                     | Stefaniak et al 2009 |
| dinF            | CGTTGRTTATRTCTACWAATCATAARGA | 52                 | ~700                   | 647                     | Brunetti et al 2017  |
| Nux1R           | GCAGTAAATAWGCTCGRGARTC       | 52                 | ~700                   | 647                     | Brunetti et al 2017  |
| 28S_F           | ACCCGCTGAATTTAAGCAT          | 62                 | ~950                   | 774                     | Reem et al 2017      |
| 28S_R           | TCCGTGTTTCAAGACGGG           | 62                 | ~950                   | 774                     | Reem et al 2017      |
| 18S_F           | AACCTGGTTGATCCTGCCAGT        | 60                 | ~1750                  | 1033                    | Reem et al 2017      |
| 18S_R           | GATCCTTCTGCAGGTTACCTAC       | 60                 | ~1750                  | 1033                    | Reem et al 2017      |
| H3_F            | ATGGCTCGTACCAAGCAGACVGC      | 55                 | ~350                   | 300                     | Reem et al 2017      |
| H3_R            | ATATCCTTRGGCATRATRGTGAC      | 55                 | ~350                   | 300                     | Reem et al 2017      |

560

561

562

563 SUPPORTING INFORMATION

564 **Table S1.** Sampling details

| Sapling Area | Coordinates                                      | Date     |
|--------------|--------------------------------------------------|----------|
| Dunedin      | 45°52'17"S, 170°31'43"E; 45°49'41"S, 170°38'29"E | 11/6/20  |
| Nelson       | 41°15'54.5"S, 173°16'44.8"E                      | 11/6/20  |
| Picton       | 41°17'21.5"S, 174°00'32.9"E                      | 20/7/20  |
| Christchurch | 43°36'17.89"S, 172°42'44.71"E                    | 14/7/20  |
| Whangateau   | 36°19'11.03"S, 174°46'55.36"E                    | 23/9/20  |
| New Plymouth | 39° 3'17.91"S, 174°3'20.85"E                     | 8/9/2020 |

565

566

567 **Table S2.** GenBank Accession Numbers

| Sequence                                                | Accession Number |
|---------------------------------------------------------|------------------|
| 1. <i>Botrylloides diegensis</i> COI -Dunedin           | MZ533117         |
| 2. <i>Botrylloides jacksonianum</i> COI -Dunedin        | MZ533119         |
| 3. <i>Botrylloides affinis anceps</i> COI -Whangateau   | MZ533118         |
| 4. <i>Botrylloides affinis anceps</i> COI -Invercargill | MZ533120         |
| 5. <i>Botrylloides diegensis</i> H3 -Dunedin            | MZ506871         |
| 6. <i>Botrylloides jacksonianum</i> H3 -Dunedin         | MZ506872         |
| 7. <i>Botrylloides diegensis</i> 18S -Dunedin           | MZ412536         |
| 8. <i>Botrylloides affinis anceps</i> 18S -Invercargill | MZ412535         |
| 9. <i>Botrylloides diegensis</i> 28S -Dunedin           | MZ506611         |
| 10. <i>Botrylloides affinis anceps</i> 28S -Whangateau  | MZ506612         |

568

569



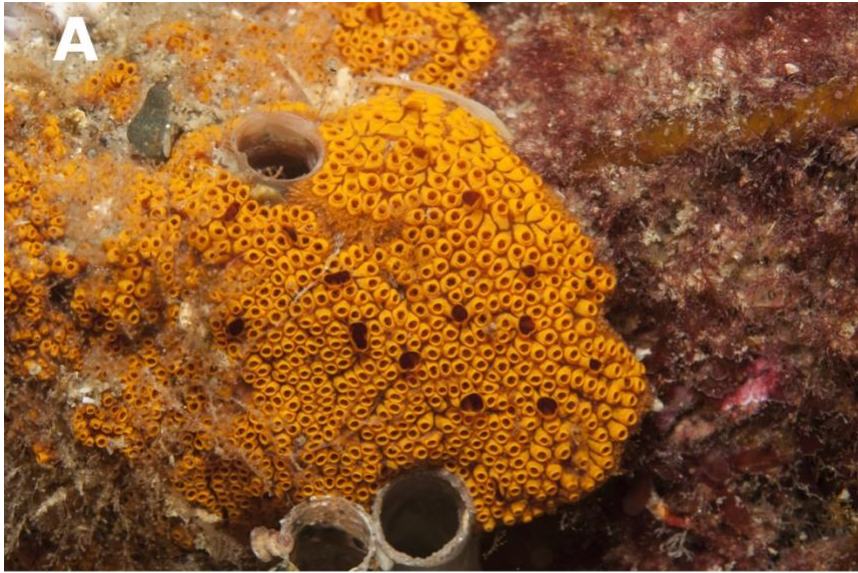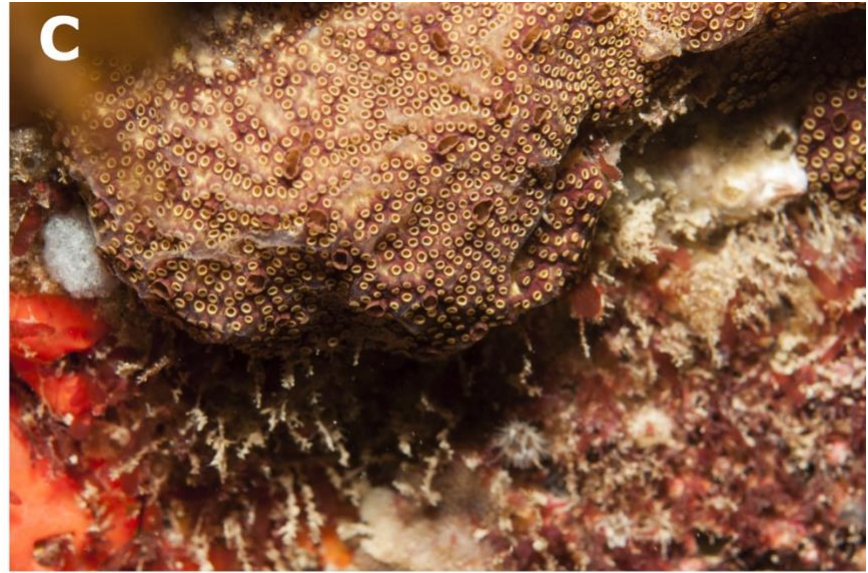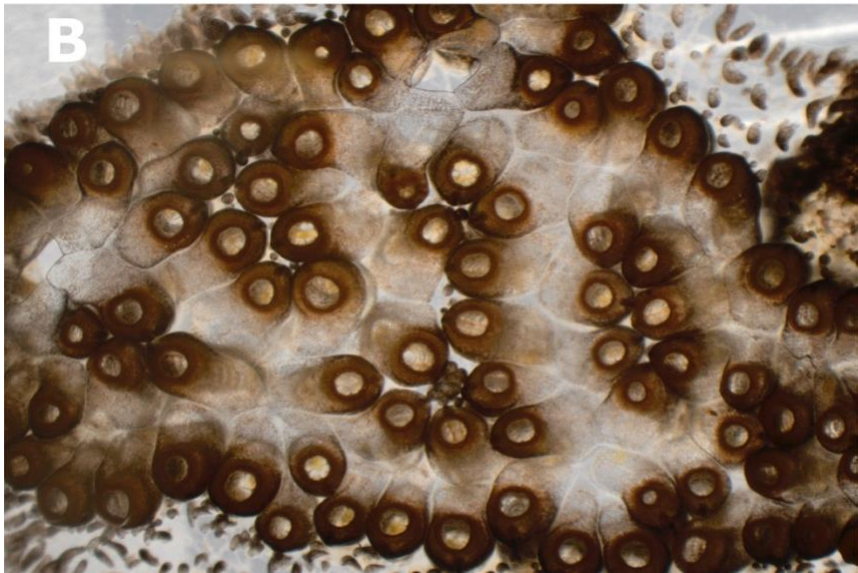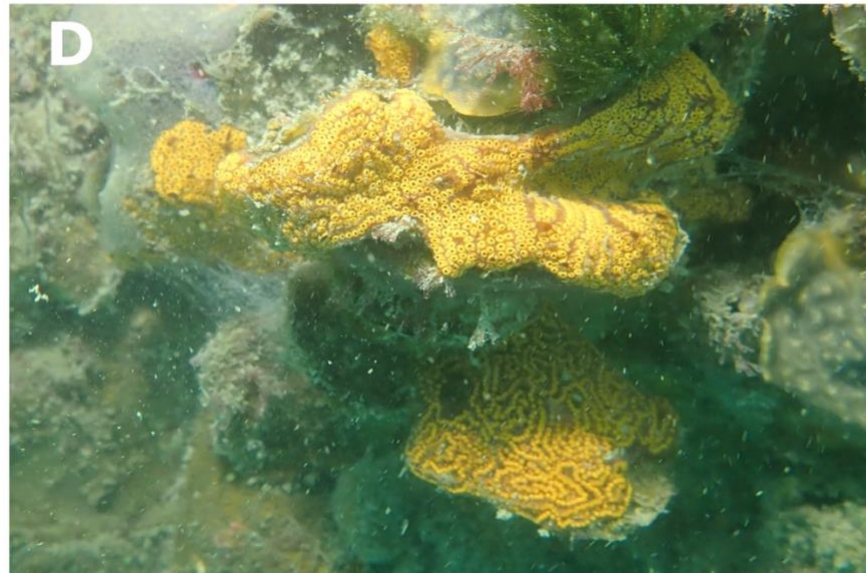

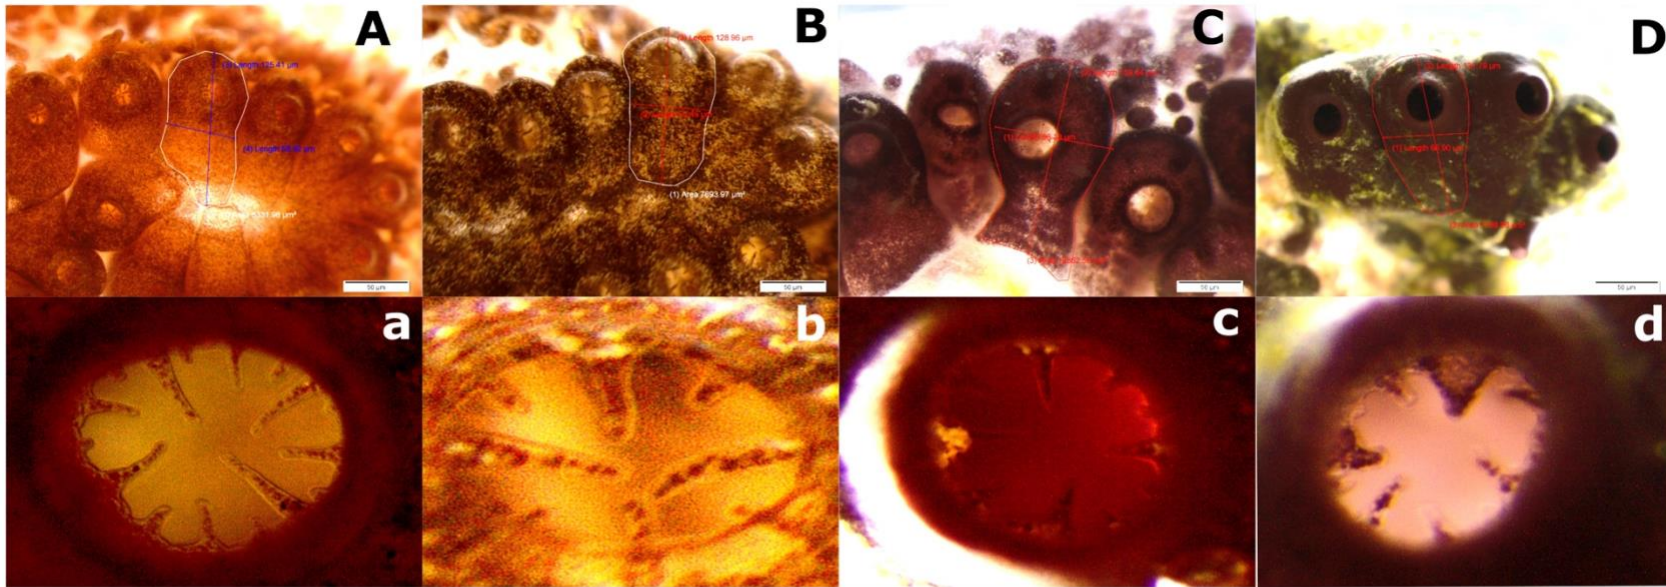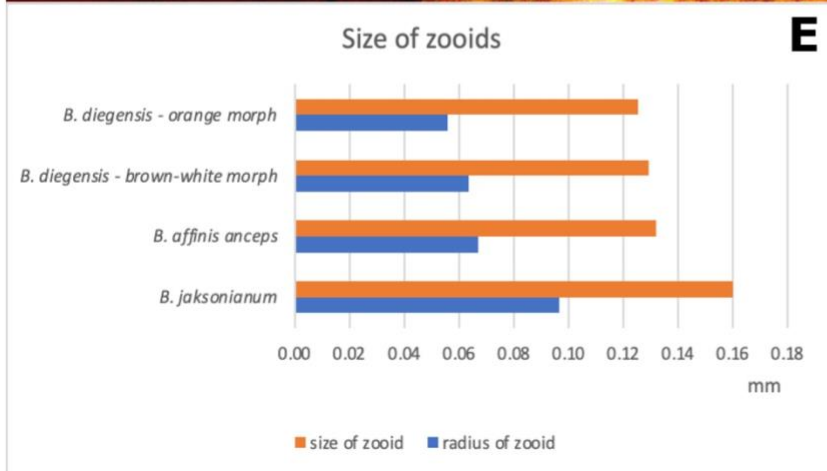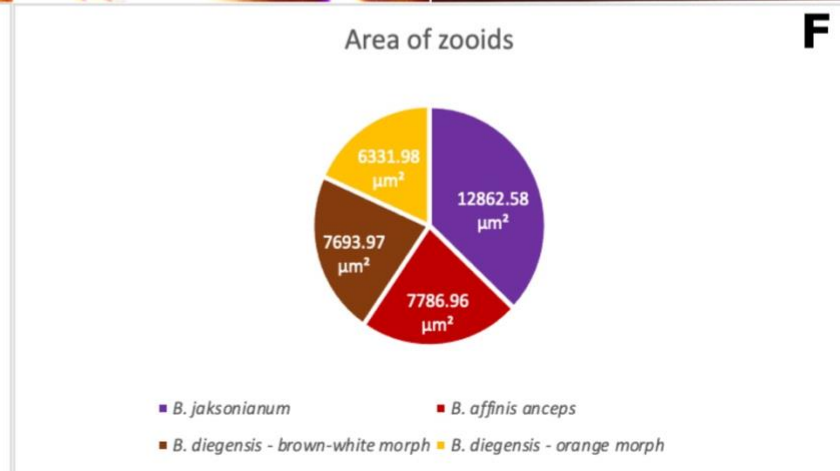

571

572

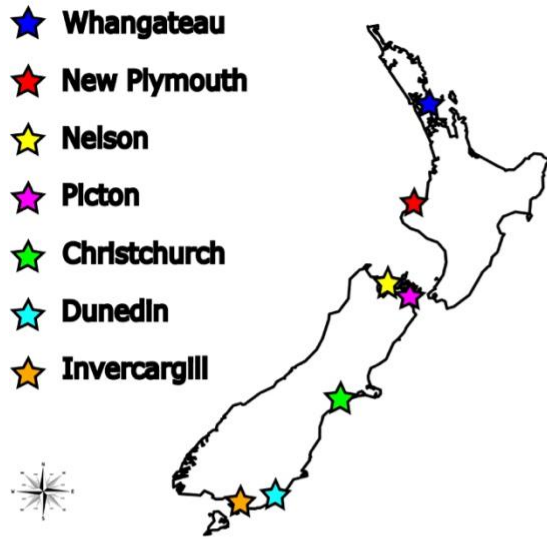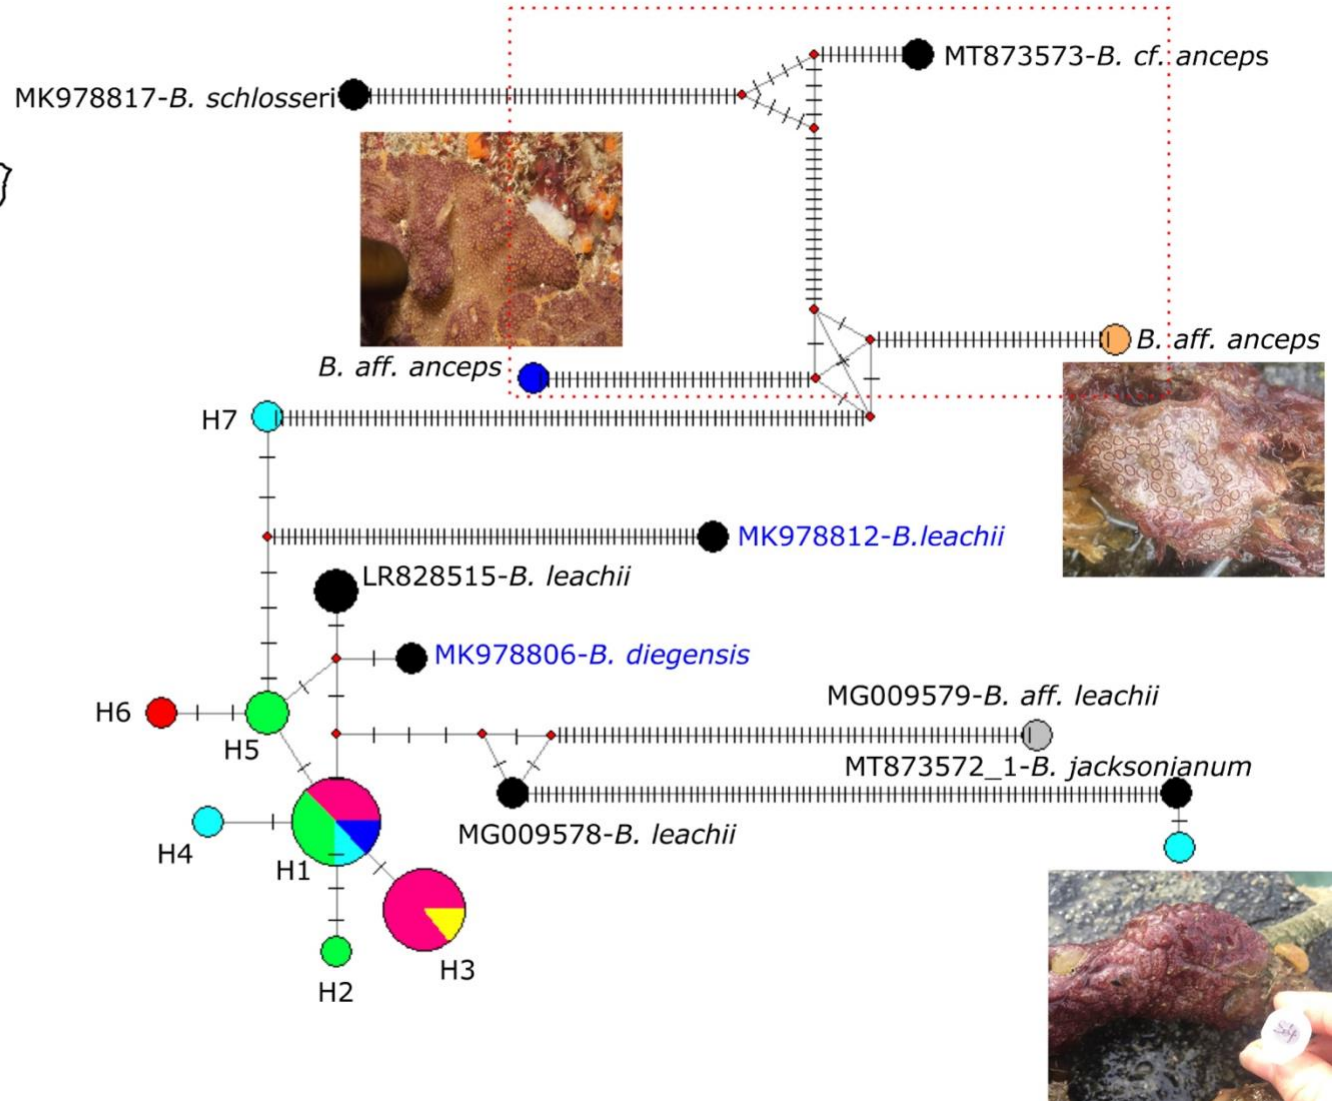

573

574

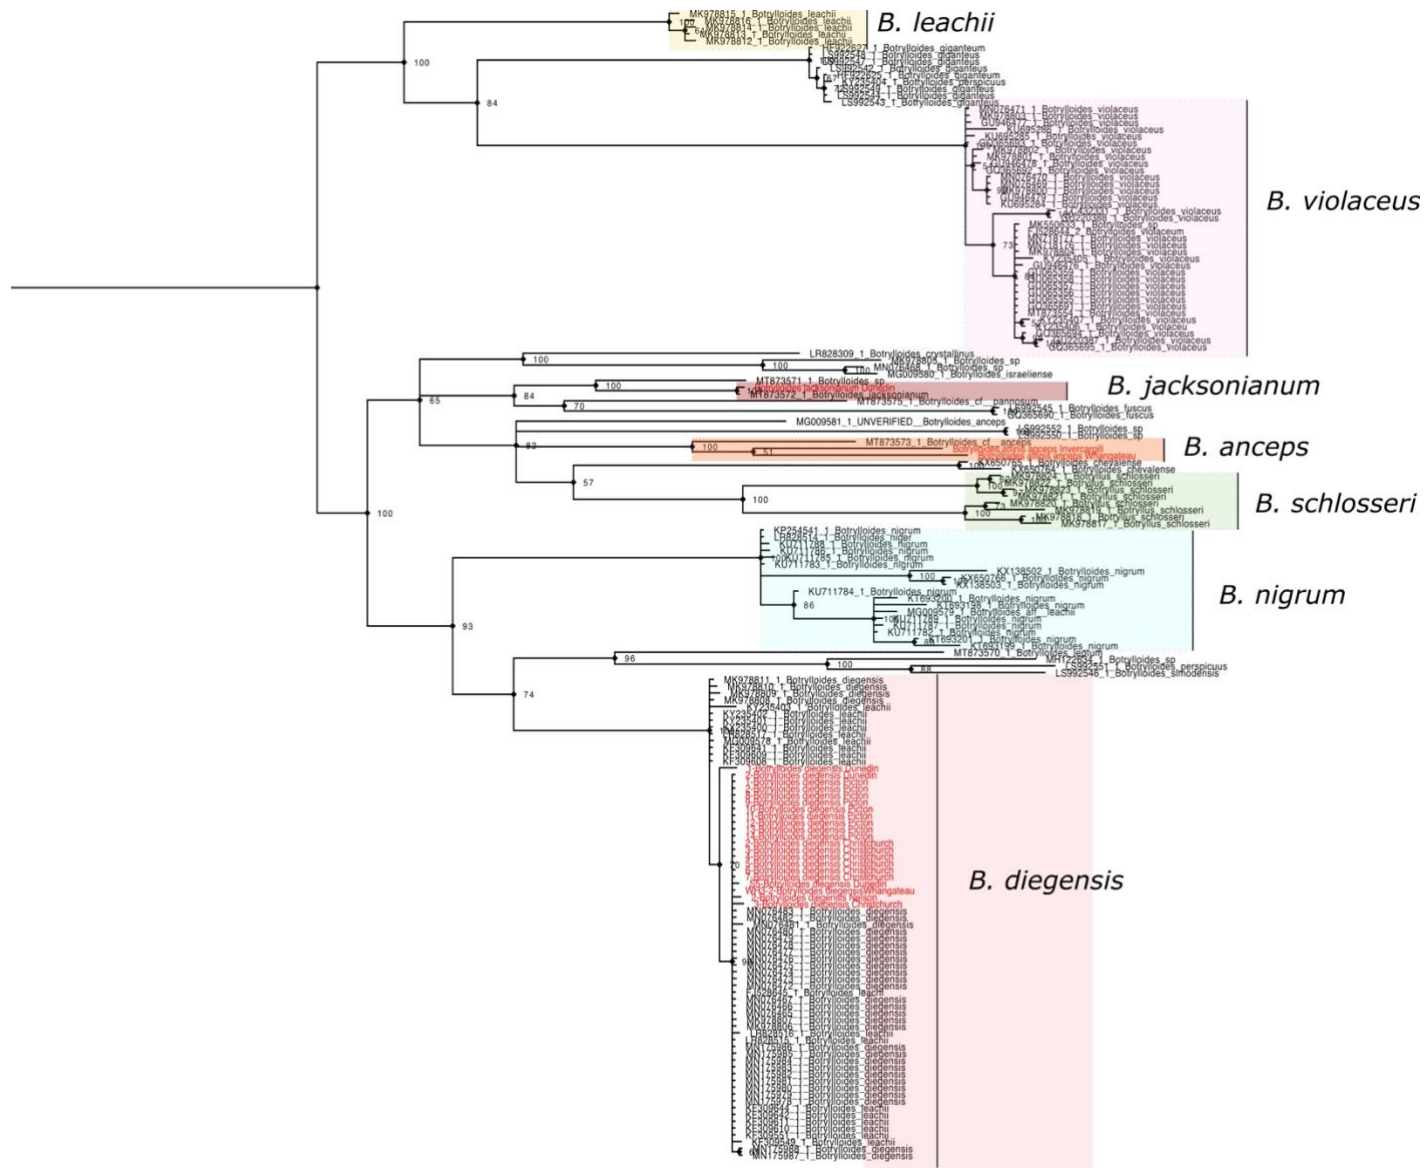

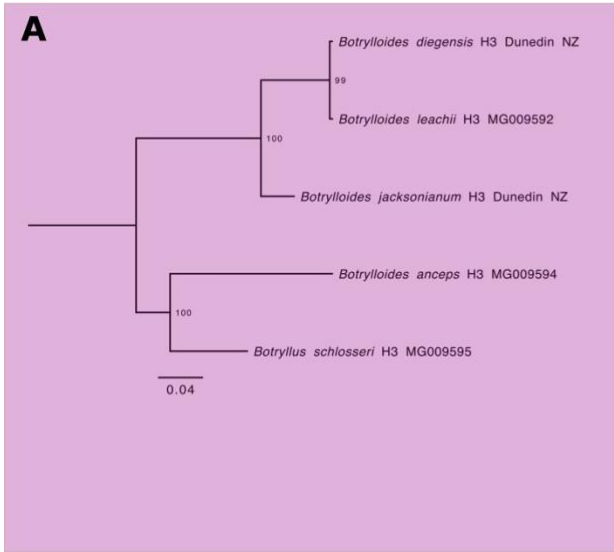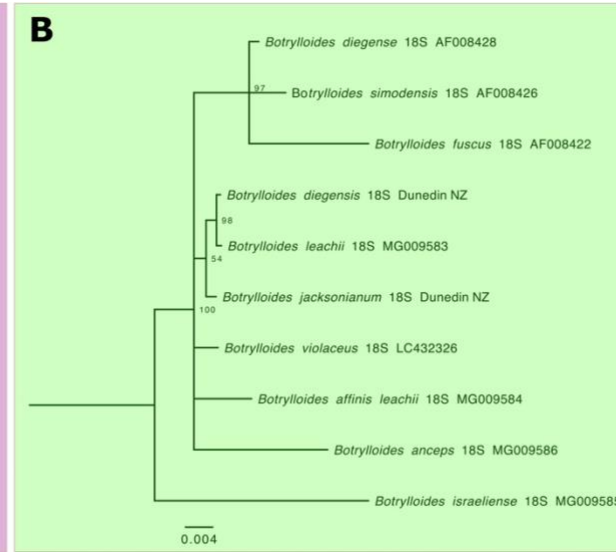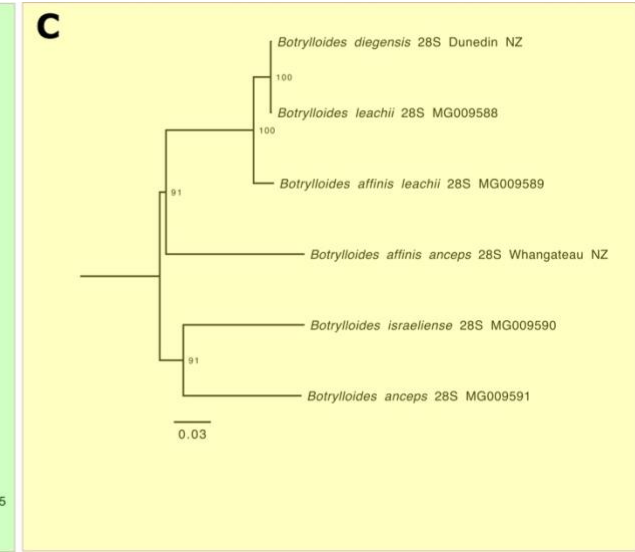

576

577

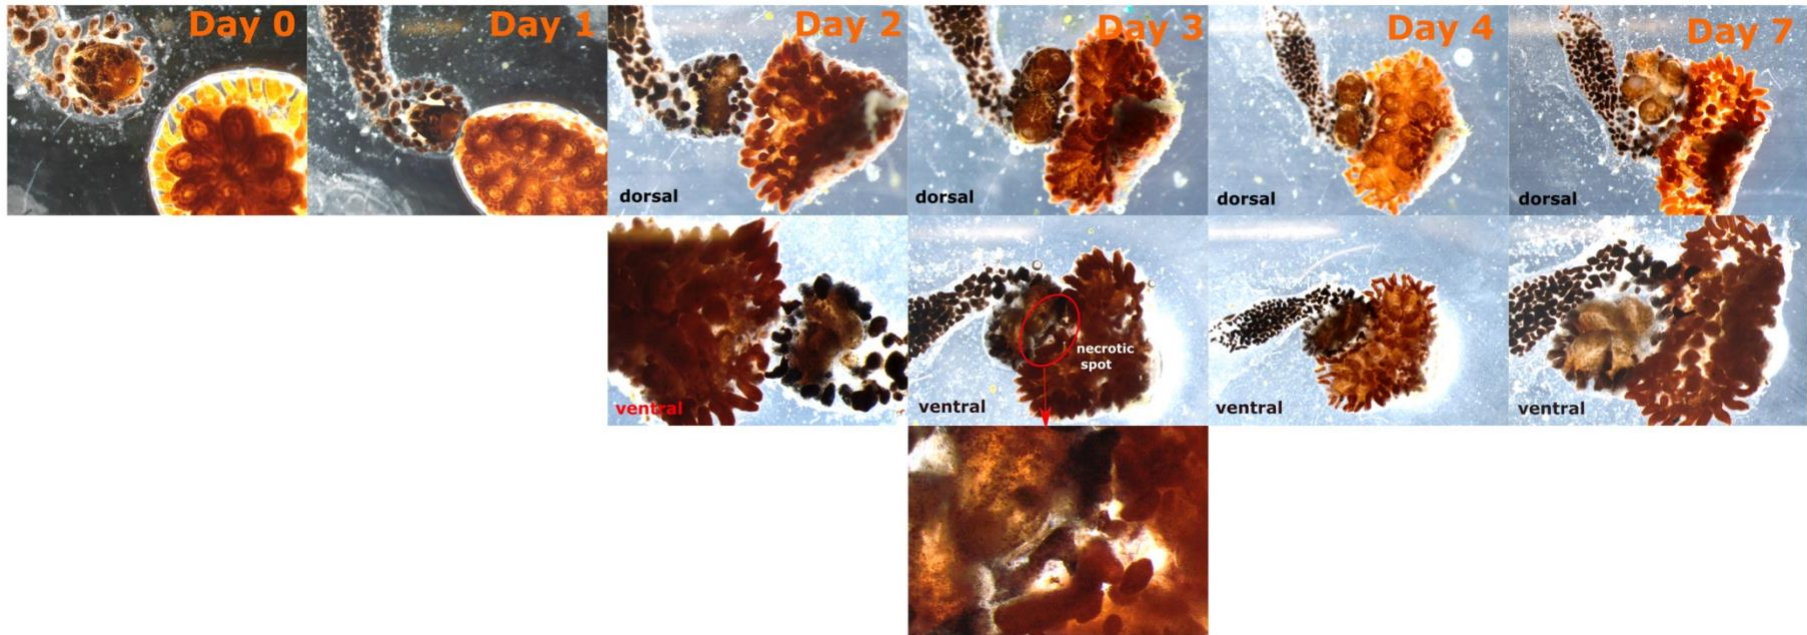

578

579

580

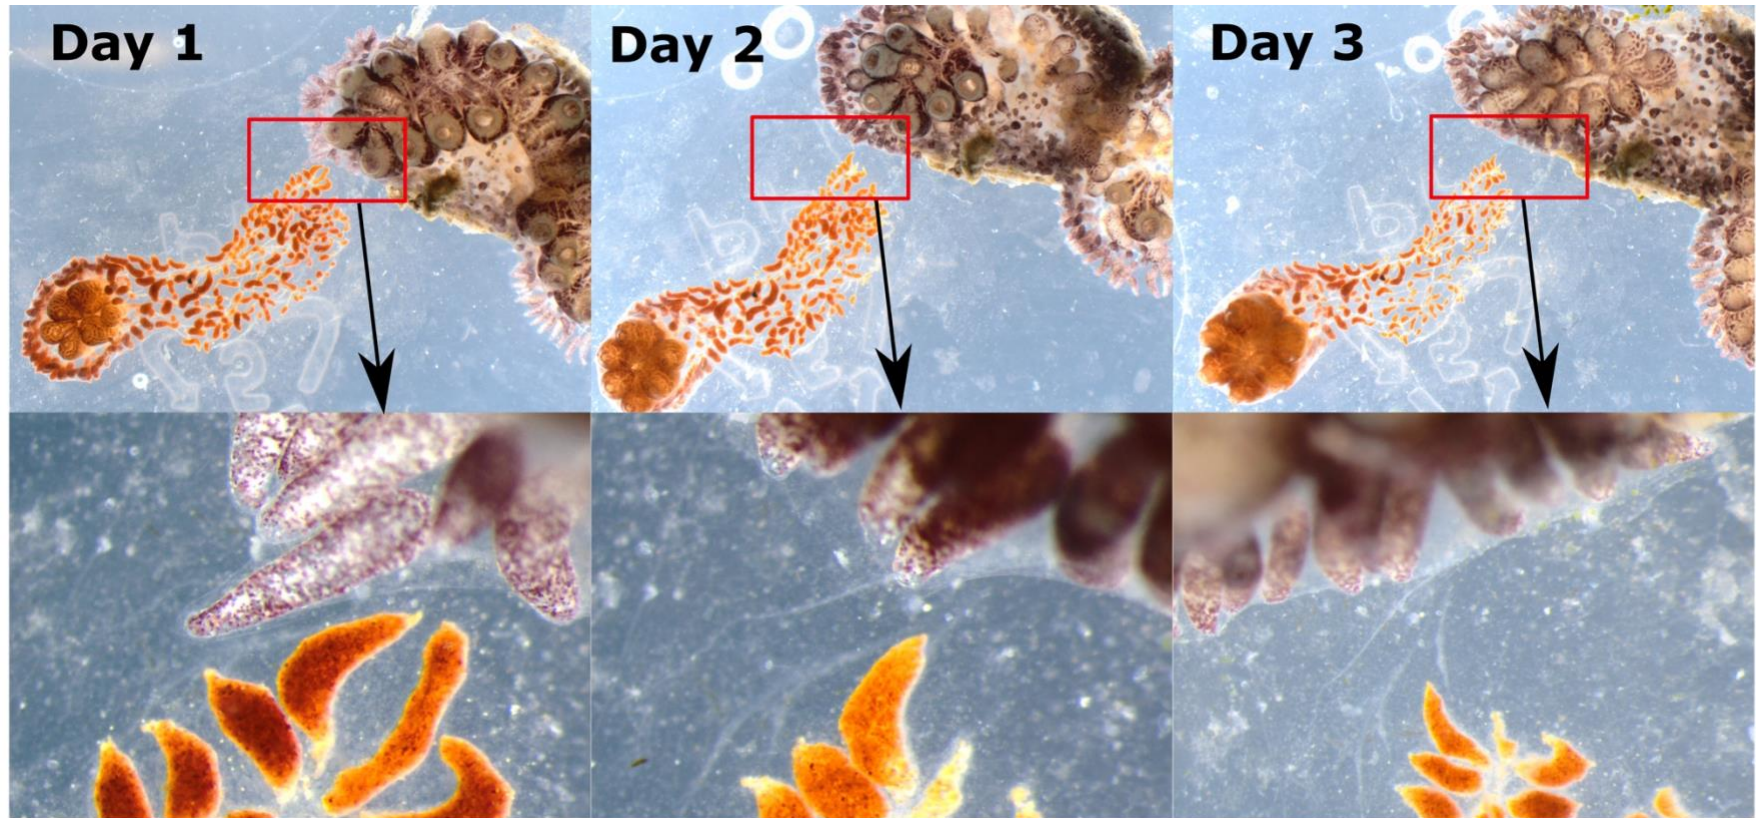

Source: https://www.biorxiv.org/content/biorxiv/early/2021/09/09/2021.09.08.459371.full.pdf
